# Supplementary material for: Circulating Tumor DNA as a Marker for Treatment Response in Metastatic Melanoma Patients Using Next-Generation Sequencing—A Prospective Feasibility Study
Source: MDPI journal article supplement (doi:10.3390/cancers13123101), 2021-06-21
Supplement: s1 [file s1]

| ID | Therapy | Mutation 1 | Mutation 2 | No. | Maf 1 | Maf 2 | Response | S100 (-0,105µg/l) | LDH (-240 U/L) | CRP (-5mg/L) |
|----|---------|------------|------------|-----|-------|-------|----------|-------------------|----------------|--------------|
| 1  | I       | NRAS Q61R  |            | 1   | 0,14  |       | NA       | 0,079             | 234            | 0,6          |
| 1  | I       | NRAS Q61R  |            | 2   | 0,08  |       | NA       | 0,070             | 191            | 25,9         |
| 1  | I       | NRAS Q61R  |            | 3   | 0     |       | CR       | 0,051             | 172            | 1,1          |
| 1  | I       | NRAS Q61R  |            | 4   | 0     |       | CR       | 0,052             | 196            | 0,6          |
| 1  | I       | NRAS Q61R  |            | 5   | 0     |       | CR       | 0,062             | 181            | 1,2          |
| 1  | I       | NRAS Q61R  |            | 6   | 0     |       | CR       | 0,059             | 196            | 0,6          |
| 1  | I       | NRAS Q61R  |            | 7   | 0     |       | CR       | 0,071             | 346            | 1,0          |
| 1  | I       | NRAS Q61R  |            | 8   | 0     |       | CR       | 0,047             | 163            | 0,9          |
| 1  | I       | NRAS Q61R  |            | 9   | 0     |       | CR       | 0,071             | 298            | 1,4          |
| 4  | I       | neg.       |            | 1   | 0     |       | NA       | 0,060             | 714            | 74,0         |
| 4  | I       | neg.       |            | 2   | 0     |       | NA       | 0,070             | 953            | 74,3         |
| 4  | I       | neg.       |            | 3   | 0     |       | PD       | 0,088             | 1150           | 9,1          |
| 4  | C       | neg.       |            | 4   | 0     |       | PD       | 0,096             | 1724           | 56,2         |
| 4  | C       | neg.       |            | 5   | 0     |       | PD       | 0,107             | 2180           | 81,3         |
| 4  | C       | neg.       |            | 6   | 0     |       | PD       | 0,164             | 3140           | 22,1         |
| 4  | C       | neg.       |            | 7   | 0     |       | PD       | 0,199             | 5438           | 80,8         |
| 5  | I       | NRAS G13V  |            | 1   | 26,03 |       | NA       | 0,376             | 272            | 2,8          |
| 5  | I       | NRAS G13V  |            | 2   | 0,05  |       | PR       | 0,105             | 239            | 1,5          |
| 5  | I       | NRAS G13V  |            | 3   | 0,72  |       | PR       | 0,102             | 248            | 2,2          |
| 5  | I       | NRAS G13V  |            | 4   | 0,54  |       | PR       | 0,108             | 208            | 10,8         |
| 5  | I       | NRAS G13V  |            | 5   | 0,16  |       | PR       | 0,130             | 222            | 2,0          |
| 5  | I       | NRAS G13V  |            | 6   | 0,16  |       | PR       | 0,109             | 231            | 3,5          |
| 5  | I       | NRAS G13V  |            | 7   | 1,08  |       | PR       | 0,187             | 212            | 4,8          |
| 5  | I       | NRAS G13V  |            | 8   | NA    |       | PR       | 0,134             | 173            | 1,9          |
| 5  | N       | NRAS G13V  |            | 9   | 0     |       | PD       | 0,120             | 317            | 144,6        |
| 6  | T       | BRAF V600E |            | 1   | 4,36  |       | NA       | 0,496             | 163            | 79,5         |
| 6  | T       | BRAF V600E |            | 2   | 0     |       | NA       | 0,143             | 187            | 4,2          |
| 6  | T       | BRAF V600E |            | 3   | 0     |       | PR       | 0,087             | 202            | 20,1         |
| 6  | T       | BRAF V600E |            | 4   | 0     |       | PR       | 0,087             | 257            | 4,5          |
| 6  | T       | BRAF V600E |            | 5   | 0     |       | PR       | NA                | NA             | NA           |
| 6  | T       | BRAF V600E |            | 6   | 0,04  |       | PR       | 0,080             | 214            | 7,5          |
| 6  | T       | BRAF V600E |            | 7   | 0,07  |       | PR       | 0,098             | 202            | 5,7          |
| 6  | T       | BRAF V600E |            | 8   | 17,06 |       | PD       | 0,161             | 244            | 2,9          |
| 6  | I       | BRAF V600E |            | 9   | 0,41  |       | PD       | 0,133             | 201            | 16,1         |
| 7  | I       | BRAF G466E | NRAS G13R  | 1   | 0,33  | 0,19  | NA       | 0,099             | 214            | 6,1          |
| 7  | I       | BRAF G466E | NRAS G13R  | 2   | 0     | 0     | NA       | 0,044             | 189            | 2,8          |
| 7  | I       | BRAF G466E | NRAS G13R  | 3   | 0     | 0     | PR       | 0,061             | 190            | 3,7          |
| 7  | I       | BRAF G466E | NRAS G13R  | 4   | 0     | 0     | PR       | 0,066             | 243            | 3,1          |
| 7  | I       | BRAF G466E | NRAS G13R  | 5   | 0     | 0     | PR       | 0,062             | 241            | 6,0          |
| 7  | I       | BRAF G466E | NRAS G13R  | 6   | 0     | 0     | PR       | 0,065             | 225            | 15,8         |
| 7  | I       | BRAF G466E | NRAS G13R  | 7   | 0     | 0     | PR       | 0,061             | 228            | 9,1          |
| 7  | I       | BRAF G466E | NRAS G13R  | 8   | 0     | 0     | PR       | 0,059             | 247            | 16,8         |
| 7  | I       | BRAF G466E | NRAS G13R  | 9   | 0     | 0     | PR       | 0,048             | 203            | 18,8         |
| 8  | I       | BRAF V600E |            | 1   | 3,97  |       | NA       | 0,131             | 221            | 18,9         |
| 8  | I       | BRAF V600E |            | 2   | 0,38  |       | SD       | 0,062             | 193            | 29,1         |
| 8  | I       | BRAF V600E |            | 3   | 0,44  |       | SD       | 0,340             | 190            | 8,0          |
| 8  | N       | BRAF V600E |            | 4   | 1,11  |       | PD       | 0,107             | 260            | 24,5         |
| 8  | T       | BRAF V600E |            | 5   | 0,9   |       | NA       | 0,094             | 412            | 41,6         |
| 8  | T       | BRAF V600E |            | 6   | 0     |       | NA       | 0,042             | 213            | 9,7          |
| 8  | T       | BRAF V600E |            | 7   | 0,05  |       | PR       | 0,032             | 267            | 4,5          |
| 8  | T       | BRAF V600E |            | 8   | 0,47  |       | PR       | 0,055             | 301            | 6,8          |
| 8  | T       | BRAF V600E |            | 9   | 0     |       | PR       | 0,037             | 254            | 3,5          |
| 9  | T       | BRAF V600E |            | 1   | 0,83  |       | NA       | 0,131             | 221            | 18,9         |
| 9  | T       | BRAF V600E |            | 2   | 1,37  |       | SD       | 0,062             | 193            | 29,1         |
| 9  | T       | BRAF V600E |            | 3   | 0     |       | SD       | 0,340             | 190            | 8,0          |
| 9  | N       | BRAF V600E |            | 4   | 2,44  |       | SD       | 0,107             | 260            | 24,5         |
| 9  | I       | BRAF V600E |            | 5   | 19,3  |       | PD       | 0,094             | 412            | 41,6         |
| 10 | I       | neg.       |            | 1   | 0     |       | NA       | 0,053             | 334            | 10,8         |
| 10 | I       | neg.       |            | 2   | 0     |       | NA       | 0,098             | 316            | 6,3          |
| 10 | I       | neg.       |            | 3   | 0     |       | SD       | 0,074             | 362            | 9,5          |
| 10 | I       | neg.       |            | 4   | 0     |       | SD       | NA                | NA             | NA           |
| 10 | I       | neg.       |            | 5   | 0     |       | SD       | 0,076             | 311            | 6,8          |
| 10 | I       | neg.       |            | 6   | 0     |       | SD       | 0,068             | 301            | 5,8          |
| 10 | I       | neg.       |            | 7   | 0     |       | SD       | 0,079             | 411            | 9,8          |
| 10 | C       | neg.       |            | 8   | 0     |       | SD       | 0,074             | 389            | 10,1         |
| 10 | C       | neg.       |            | 9   | 0     |       | SD       | 0,082             | 980            | 3,8          |
| 12 | T       | BRAF V600E |            | 1   | 2,91  |       | NA       | 0,119             | 175            | 96,2         |
| 12 | T       | BRAF V600E |            | 2   | 0     |       | NA       | NA                | NA             | NA           |
| 12 | T       | BRAF V600E |            | 3   | 0     |       | PD*      | NA                | 215            | 4,4          |
| 12 | I       | BRAF V600E |            | 4   | 0     |       | PD       | 0,032             | 251            | 4,6          |
| 12 | I       | BRAF V600E |            | 5   | 0     |       | PD*      | 0,028             | 155            | 2,0          |
| 12 | I       | BRAF V600E |            | 6   | 0     |       | PD       | 0,040             | 215            | 4,6          |

| ID | Therapy | Mutation 1 | Mutation 2 | No. | Maf 1 | Maf 2 | Response | S100 (-0,105µg/l) | LDH (-240 U/L) | CRP (-5mg/L) |
|----|---------|------------|------------|-----|-------|-------|----------|-------------------|----------------|--------------|
| 12 | I       | BRAF V600E |            | 7   | 0     |       | PD       | 0,048             | 279            | 2,3          |
| 12 | I       | BRAF V600E |            | 8   | 0,24  |       | PD*      | 0,039             | 215            | 4,5          |
| 12 | I       | BRAF V600E |            | 9   | 0,25  |       | PD       | 0,035             | 429            | 5,3          |
| 13 | T       | BRAF V600E |            | 1   | 0     |       | NA       | 0,099             | 205            | 1,3          |
| 13 | T       | BRAF V600E |            | 2   | 0     |       | PR       | 0,117             | 293            | 0,8          |
| 13 | T       | BRAF V600E |            | 3   | 0     |       | PR       | 0,120             | 471            | 0,6          |
| 13 | T       | BRAF V600E |            | 4   | 0     |       | PR       | 0,099             | 365            | 2,4          |
| 13 | T       | BRAF V600E |            | 5   | 0     |       | PR       | 0,101             | 296            | 2,2          |
| 13 | T       | BRAF V600E |            | 6   | 0     |       | CR       | 0,094             | 288            | 2,3          |
| 13 | T       | BRAF V600E |            | 7   | 0     |       | NA       | 0,088             | 304            | 1,3          |
| 13 | T       | BRAF V600E |            | 8   | 0     |       | PD*      | 0,088             | 322            | 2,5          |
| 15 | I       | neg.       |            | 1   | 0     |       | NA       | 0,112             | 466            | 3,1          |
| 15 | I       | neg.       |            | 2   | 0     |       | SD       | 1,640             | 275            | 5,5          |
| 15 | I       | neg.       |            | 3   | 0     |       | SD       | 0,458             | 295            | 56,2         |
| 15 | N       | neg.       |            | 4   | 0     |       | PD       | 1,340             | 207            | 91,0         |
| 15 | C       | neg.       |            | 5   | 0     |       | PD       | 3,930             | 361            | 226,3        |
| 15 | C       | neg.       |            | 6   | 0     |       | PD       | 3,570             | 512            | 72,7         |
| 17 | I       | QNAQ Q209L |            | 1   | 6     |       | NA       | 0,484             | 496            | 4,6          |
| 17 | I       | QNAQ Q209L |            | 2   | 11,8  |       | PD       | 0,433             | 525            | 3,8          |
| 17 | N       | QNAQ Q209L |            | 3   | 17,7  |       | PD       | 0,499             | 821            | 11,3         |
| 17 | C       | QNAQ Q209L |            | 4   | 7,25  |       | PD       | 0,716             | 845            | 21,8         |
| 17 | C       | QNAQ Q209L |            | 5   | 22,69 |       | PD       | 2,190             | 1674           | 43,2         |
| 17 | C       | QNAQ Q209L |            | 6   | 22,36 |       | PD       | 2,140             | 1745           | 59,1         |
| 18 | I       | BRAF D594N |            | 1   | 0     |       | NA       | 0,062             | 266            | 2,7          |
| 18 | I       | BRAF D594N |            | 2   | 0     |       | SD       | 0,063             | 384            | 3,0          |
| 18 | N       | BRAF D594N |            | 3   | 0     |       | SD       | 0,068             | 371            | 79,6         |
| 18 | N       | BRAF D594N |            | 4   | 0     |       | PR       | 0,065             | 228            | 2,4          |
| 18 | N       | BRAF D594N |            | 5   | 0     |       | PR       | 0,040             | 222            | 7,1          |
| 18 | N       | BRAF D594N |            | 6   | 0     |       | CR       | 0,039             | 229            | 6,8          |
| 18 | N       | BRAF D594N |            | 7   | 0     |       | CR       | 0,038             | 223            | 6,0          |
| 18 | N       | BRAF D594N |            | 8   | 0     |       | CR       | 0,046             | 203            | 3,5          |
| 18 | N       | BRAF D594N |            | 9   | 0     |       | NA       | 0,049             | 251            | 1,8          |
| 21 | I       | CDKN2A R80 |            | 1   | 0     |       | NA       | 0,068             | 201            | 1,5          |
| 21 | I       | CDKN2A R80 |            | 2   | 0     |       | NA       | 0,056             | 192            | 5,2          |
| 21 | I       | CDKN2A R80 |            | 3   | 0     |       | PR       | 0,063             | 197            | 4,8          |
| 21 | I       | CDKN2A R80 |            | 4   | 0     |       | PR       | 0,062             | 211            | 1,4          |
| 21 | I       | CDKN2A R80 |            | 5   | 0     |       | PR       | 62,000            | 181            | 1,2          |
| 21 | I       | CDKN2A R80 |            | 6   | 0     |       | PR       | 0,044             | 200            | 1,4          |
| 21 | I       | CDKN2A R80 |            | 7   | 0     |       | PR       | 0,039             | 187            | 2,9          |
| 21 | N       | CDKN2A R80 |            | 8   | 0     |       | PR       | 0,049             | 147            | 1,6          |
| 22 | I       | BRAF V600E |            | 1   | 28,69 |       | NA       | 5,380             | 827            | 76,9         |
| 22 | T       | BRAF V600E |            | 2   | NA    |       | NA       | 0,160             | 361            | 10,3         |
| 22 | T       | BRAF V600E |            | 3   | 0     |       | PR       | 0,105             | 205            | 7,4          |
| 24 | I       | neg.       |            | 1   | 0     |       | NA       | 0,024             | 247            | 0,9          |
| 24 | I       | neg.       |            | 2   | 0     |       | NA       | 0,033             | 243            | 243,0        |
| 24 | N       | neg.       |            | 3   | 0     |       | PD       | 0,112             | 429            | 0,6          |
| 24 | I       | neg.       |            | 4   | 0     |       | PD       | 0,039             | 360            | 1,5          |
| 24 | I       | neg.       |            | 5   | 0     |       | PD       | 0,044             | 269            | 0,6          |
| 24 | N       | neg.       |            | 6   | 0     |       | PD       | 0,026             | 290            | 1,0          |
| 24 | N       | neg.       |            | 7   | 0     |       | PD       | 0,093             | 281            | 1,0          |
| 24 | N       | neg.       |            | 8   | 0     |       | NA       | 0,068             | 285            | 3,6          |
| 25 | I       | neg.       |            | 1   | 0     |       | NA       | 1,390             | 432            | 15,2         |
| 25 | N       | neg.       |            | 2   | 0     |       | PD       | 2,810             | 671            | 31,7         |
| 25 | C       | neg.       |            | 3   | 0     |       | PD       | 0,342             | 241            | 1,2          |
| 25 | C       | neg.       |            | 4   | 0     |       | PD       | 0,157             | 219            | 1,0          |
| 25 | C       | neg.       |            | 5   | 0     |       | PD       | 0,098             | 306            | 0,6          |
| 25 | C       | neg.       |            | 6   | 0     |       | PD       | 0,352             | 315            | 0,6          |
| 25 | N       | neg.       |            | 7   | 0     |       | PD       | 1,760             | 488            | 3,4          |
| 25 | N       | neg.       |            | 8   | 0     |       | PD*      | 2,240             | 572            | 9,9          |
| 27 | I       | BRAF V600E |            | 1   | 0     |       | NA       | 0,043             | 173            | 8,1          |
| 27 | I       | BRAF V600E |            | 2   | 0     |       | NA       | 0,079             | 291            | 2,1          |
| 27 | I       | BRAF V600E |            | 3   | 0     |       | PD       | 0,059             | 373            | 1,1          |
| 27 | T       | BRAF V600E |            | 4   | 0     |       | NA       | 0,049             | 226            | 0,8          |
| 27 | T       | BRAF V600E |            | 5   | 0     |       | NA       | 0,052             | 273            | 4,3          |
| 27 | T       | BRAF V600E |            | 6   | 0     |       | SD       | 0,116             | 304            | 1,1          |
| 27 | T       | BRAF V600E |            | 7   | 0     |       | SD       | 0,086             | 242            | 4,7          |
| 29 | T       | BRAF V600E | RAC1 P29L  | 1   | 11,35 | 8,06  | NA       | 0,320             | 278            | 2,8          |
| 29 | T       | BRAF V600E | RAC1 P29L  | 2   | 0,04  | 0     | NA       | 0,096             | 323            | 11,3         |
| 29 | T       | BRAF V600E | RAC1 P29L  | 3   | 0     | 0     | PD*      | 0,084             | 519            | 6,1          |
| 30 | I       | NRAS Q61R  |            | 1   | 0     |       | NA       | 0,069             | 237            | 1,4          |
| 30 | I       | NRAS Q61R  |            | 2   | 0     |       | SD       | 0,104             | 233            | 9,4          |
| 30 | I       | NRAS Q61R  |            | 3   | 0     |       | SD       | 0,085             | 207            | 10,1         |
